# Supplementary material for: Trehalose significantly enhances the recovery of serum and serum exosomal miRNA from a paper-based matrix
Source: PubMed Central journal article supplement (PMC5709463; doi:10.1038/s41598-017-16960-8), 2017-11-30

1 **Trehalose significantly enhances the recovery of serum and serum**  
2 **exosomal miRNA from a paper-based matrix**

3

4 Shu Hui Neo<sup>1,\*</sup>, Ka Yan Chung<sup>1</sup>, Jia Min Quek<sup>1</sup>, Heng-Phon Too<sup>1,2,\*</sup>

5

6 <sup>1</sup>Bioprocessing Technology Institute, Agency for Science, Technology and Research  
7 (A\*STAR), 20 Biopolis Way, #06-01 Centros, Singapore, 138668, Singapore.

8 <sup>2</sup>Department of Biochemistry, Yong Loo Lin School of Medicine, National University  
9 of Singapore, Block MD7, 8 Medical Drive, Singapore, 117597 Singapore.

10 \*Correspondence:

11 Heng-Phon Too [heng-phon\\_too@nuhs.edu.sg](mailto:heng-phon_too@nuhs.edu.sg)

12 Shu Hui Neo [neo\\_shu\\_hui@bti.a-star.edu.sg](mailto:neo_shu_hui@bti.a-star.edu.sg)

13

14 **Supplementary Information**

15 **Supplementary Figure 1. miRNA recovery from serum-spotted FTA Elute card**  
16 **was lower than plasma collected in sodium citrate-collection tube when**  
17 **extracted using water and heat. (A)** RNA was extracted directly from 20 µl serum  
18 (black) or 20 µl plasma collected in sodium citrate-containing tube (plasma-citrate)  
19 (white) using QIAzol lysis reagent. 10 miRNAs in each sample were quantified by  
20 RT-qPCR based on their copy numbers. **(B)** Two synthetic miRNAs (SP4 and SP9)  
21 were spiked into 20 µl serum or plasma collected using either EDTA- or sodium  
22 citrate-collection tubes and RNA was extracted directly using QIAzol lysis reagent. %

23 recovery of these two miRNAs was determined by comparing the copy numbers  
24 obtained from same amount of synthetic miRNAs used directly for RT-qPCR. RNA  
25 was extracted from a 6mm FTA Elute card disc punch-out spotted with 20 µl serum  
26 (black) or 20 µl plasma-citrate (white), using water and heating at 95°C for 30 min.  
27 10 miRNAs were quantified and their copy numbers **(C)** and individual % miRNA  
28 recovery **(D)** were presented. **(E)** RNA was extracted from a 6mm FTA Elute card  
29 disc punch-out spotted with 20 µl serum using either water and heating at 95°C for  
30 30 min (Water) or QIAzol lysis reagent (QIAzol). These two methods were performed  
31 in absence (-Washing) or presence of washing (+ Washing) with 70% ethanol. (%  
32 recovery = (Copy number of miRNA extracted from FTA Elute discs/ Copy number of  
33 miRNA extracted directly from serum) x 100%). Student's *t*-test was performed for  
34 (A, C, D). One-way ANOVA analysis, followed by Bonferroni's pairwise comparisons  
35 test data was performed for (E). Each experimental condition was carried out thrice  
36 and data were presented as mean ± SEM (\*\**P* ≤ 0.001; \*\* *P* ≤ 0.01; ns: not significant,  
37 *n* = 3).

38 **Supplementary Figure 2. Extraction of synthetic miRNAs from FTA Elute cards.**

39 Synthetic miRNA let-7a-5p **(A)** and miR-146a-5p **(B)** were spotted on FTA Elute card  
40 disc punch-out at different concentrations. RNA was then isolated from FTA Elute  
41 card disc punch-out (grey) using QIAzol lysis reagent and compared with pure  
42 synthetic miRNA (neat) used directly for RT-qPCR (black). Each experimental  
43 condition was carried out in triplicates. Graph indicates Ct value with SEM obtained  
44 at each miRNA concentration.

45 **Supplementary Figure 3. miRNA recovery from serum-spotted trehalose pre-**  
46 **treated FTA Elute card using phenol-based extraction or column-based**

47 **extraction were similar. (A)** 20  $\mu$ l serum spotted on trehalose-treated 6mm FTA  
48 Elute card disc punch-out was subjected to RNA extraction using phenol-containing  
49 reagents (QIAzol lysis reagent, Trizol reagent, Trizol-LS reagent) or column-based  
50 RNA extraction kit (Ambion). 10 miRNAs were quantified and individual % miRNA  
51 recovery of each method was calculated (% recovery = (Copy number of miRNA  
52 extracted from FTA Elute card disc punch-out / Copy number of miRNA extracted  
53 directly from 20  $\mu$ l serum) x 100%). **(B)** Average % miRNA recovery of all 10  
54 miRNAs was determined. One-way ANOVA analysis, followed by Bonferroni's  
55 pairwise comparisons test, was performed to compare other methods with QIAzol  
56 lysis reagent. Each experimental condition was carried out thrice and data were  
57 presented as mean  $\pm$  SEM (\*\* $P \leq 0.001$ ; \* $P \leq 0.01$ ; ns: not significant, n=3).

58 **Supplementary Figure 4. Comparison of different storage temperature and**  
59 **trehalose for FTA Elute card stored for 1 week. (A)** Untreated or 50mg/ml  
60 trehalose-treated 6mm FTA Elute card disc punch-out spotted with 20ul serum were  
61 dried and stored at RT, 4°C or -20°C for 1 week before RNA was extracted using  
62 QIAzol lysis reagent. 10 miRNAs were quantified by RT-qPCR and their copy  
63 numbers were presented. Neat refers to copy number of each individual miRNA  
64 obtained from 20  $\mu$ l serum extracted directly using QIAzol lysis reagent. The  
65 individual % miRNA recovery was compared between untreated and trehalose-  
66 treated FTA Elute card disc punch-out. **(B)** Average % miRNA recovery of all 10  
67 miRNAs was calculated and plotted to compare the effect of pre-treatment of FTA  
68 Elute card disc punch-out with 50mg/ml trehalose. Statistical analyses were  
69 performed with one-way ANOVA, followed by Bonferroni's pairwise comparisons test

70 data between selected pairs. Each experimental condition was carried out thrice and  
71 data were presented as mean  $\pm$  SEM (\*\* $P \leq 0.001$ ; \* $P \leq 0.01$ ; \* $P \leq 0.05$ ,  $n=3$ ).

72 **Supplementary Figure 5. Comparison of different storage temperature and**

73 **trehalose for FTA Elute card stored for 2 weeks. (A)** Untreated or 50mg/ml

74 trehalose-treated 6mm FTA Elute card disc punch-out spotted with 20ul serum were

75 dried and stored at RT, 4°C or -20°C for 2 weeks before RNA was extracted using

76 QIAzol lysis reagent. 10 miRNAs were quantified by RT-qPCR and their copy

77 numbers were presented. Neat refers to copy number of each individual miRNA

78 obtained from 20  $\mu$ l serum extracted directly using QIAzol lysis reagent. The

79 individual % miRNA recovery was compared between untreated and trehalose-

80 treated FTA Elute card disc punch-out. **(B)** Average % miRNA recovery of all 10

81 miRNAs was calculated and plotted to compare the effect of pre-treatment of FTA

82 Elute card disc punch-out with 50mg/ml trehalose. Statistical analyses were

83 performed with one-way ANOVA, followed by Bonferroni's pairwise comparisons test

84 data between selected pairs. Each experimental condition was carried out thrice and

85 data were presented as mean  $\pm$  SEM (\*\* $P \leq 0.001$ ; \* $P \leq 0.01$ ; \* $P \leq 0.05$ ,  $n=3$ ).

86 **Supplementary Figure 6. miRNA representation in long-term storage samples.**

87 20  $\mu$ l serum spotted on trehalose-treated 6mm FTA Elute card disc punch-out was

88 subjected to accelerated aging of 1, 6 and 12 months before RNA was extracted

89 using QIAzol lysis reagent. 10 miRNAs were quantified and Ct values were

90 compared with 20  $\mu$ l serum extracted directly using QIAzol lysis reagent (neat). Each

91 experimental condition was carried out in thrice and data were presented as mean Ct

92  $\pm$  SEM.

# Supplementary Figure 1

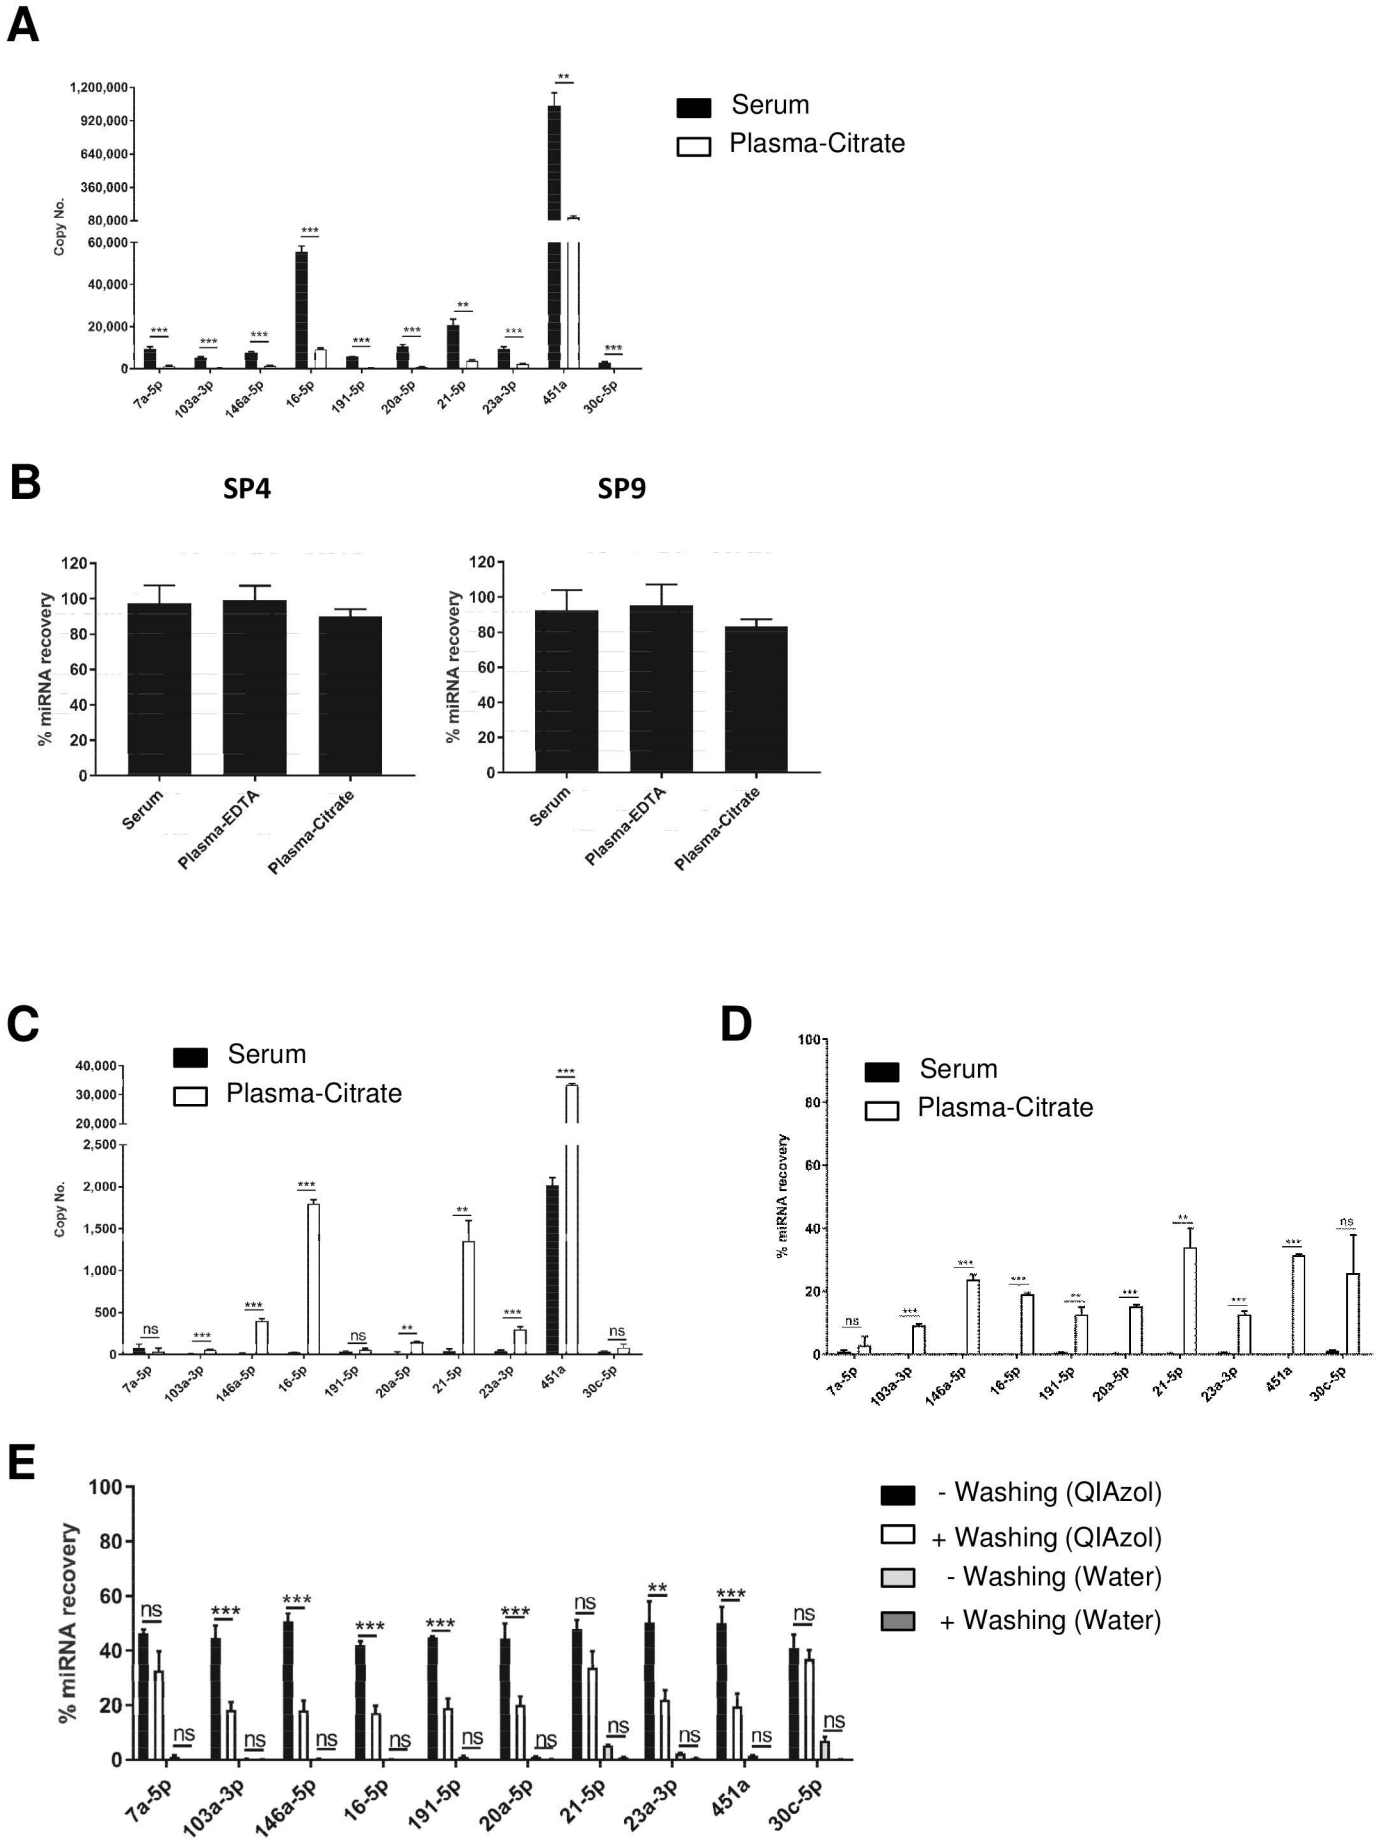

## Supplementary Figure 2

**A**

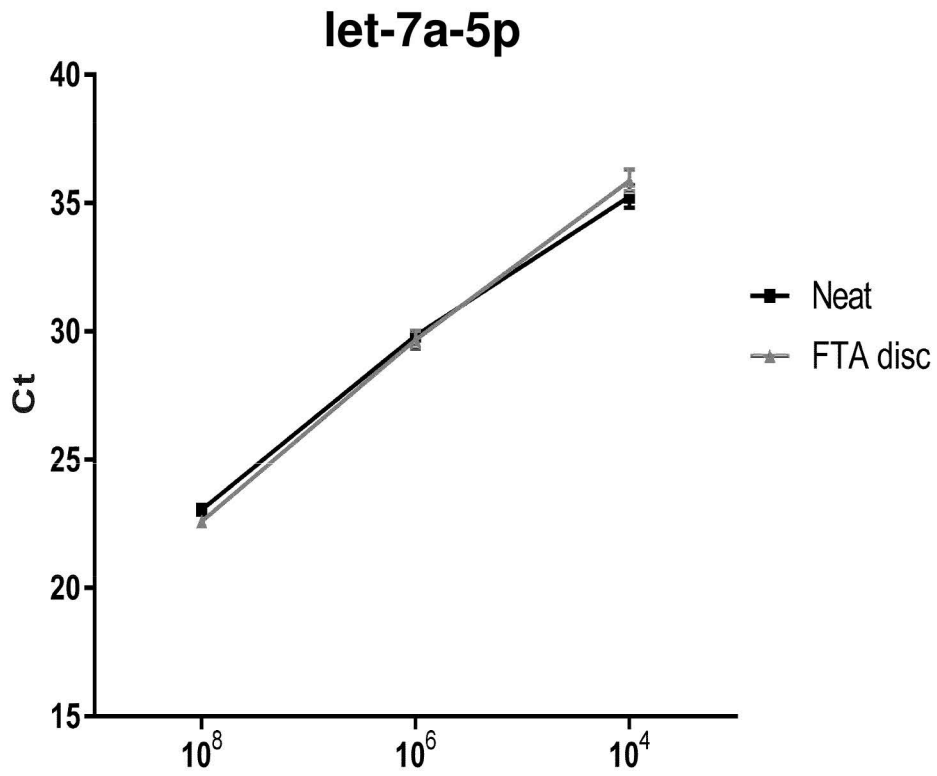

**B**

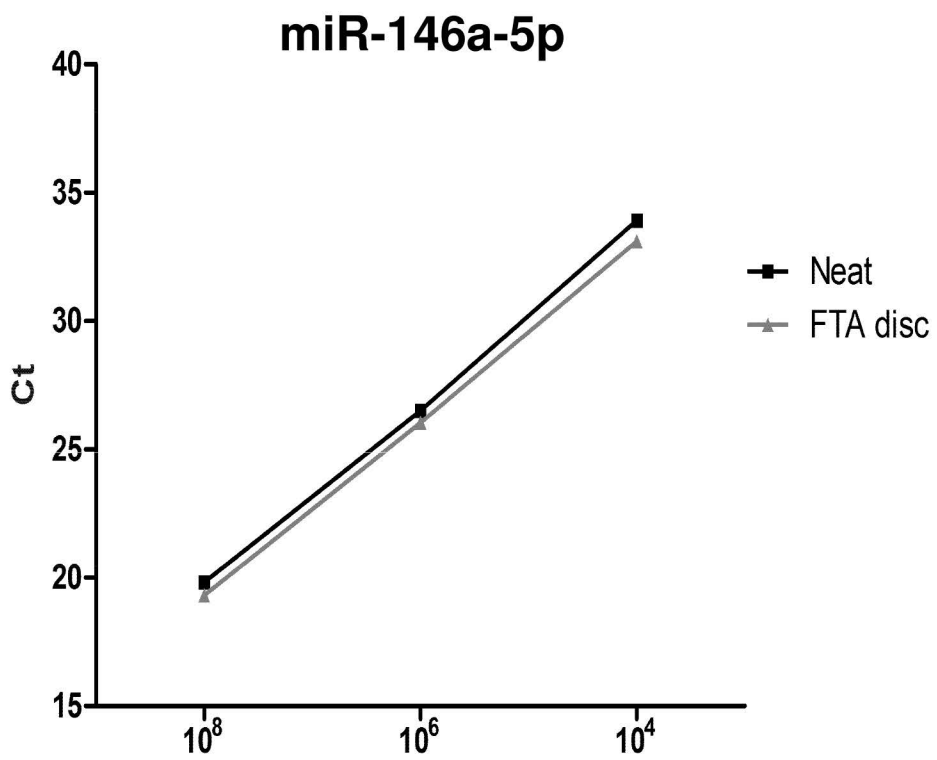

# Supplementary Figure 3

## A

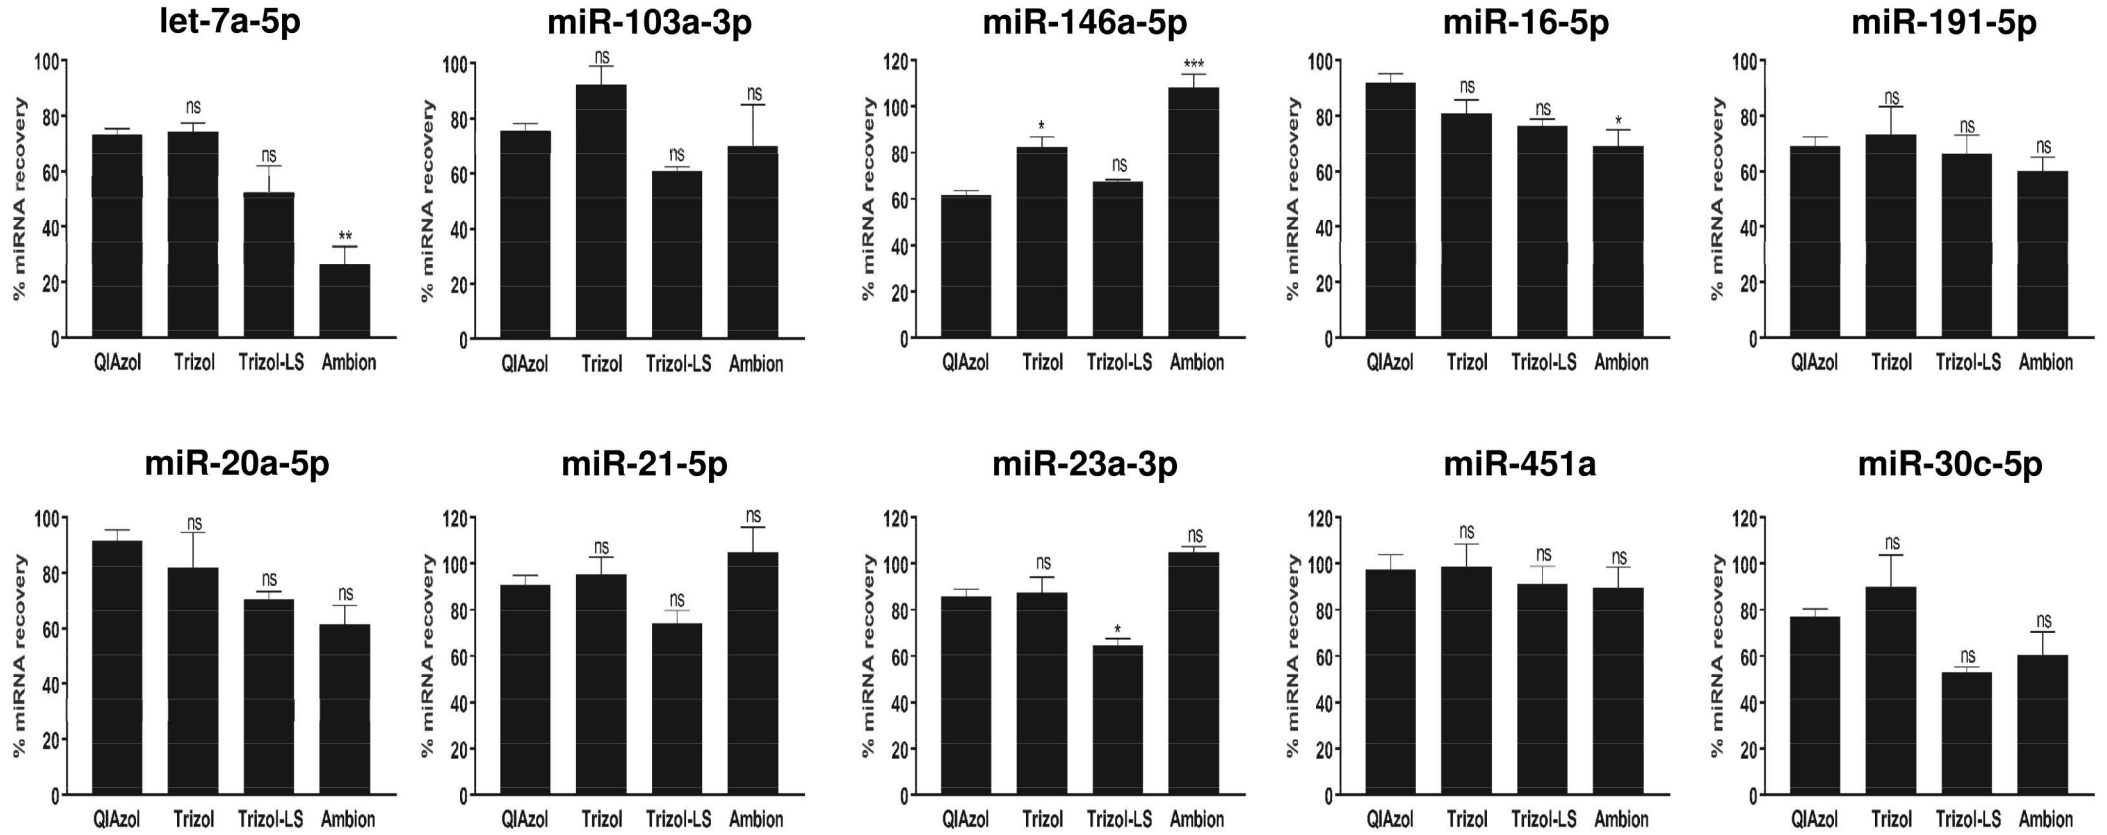

## B

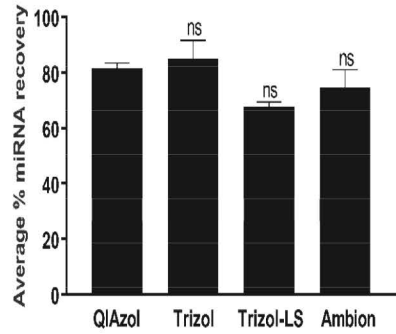

# Supplementary Figure 4

**A**

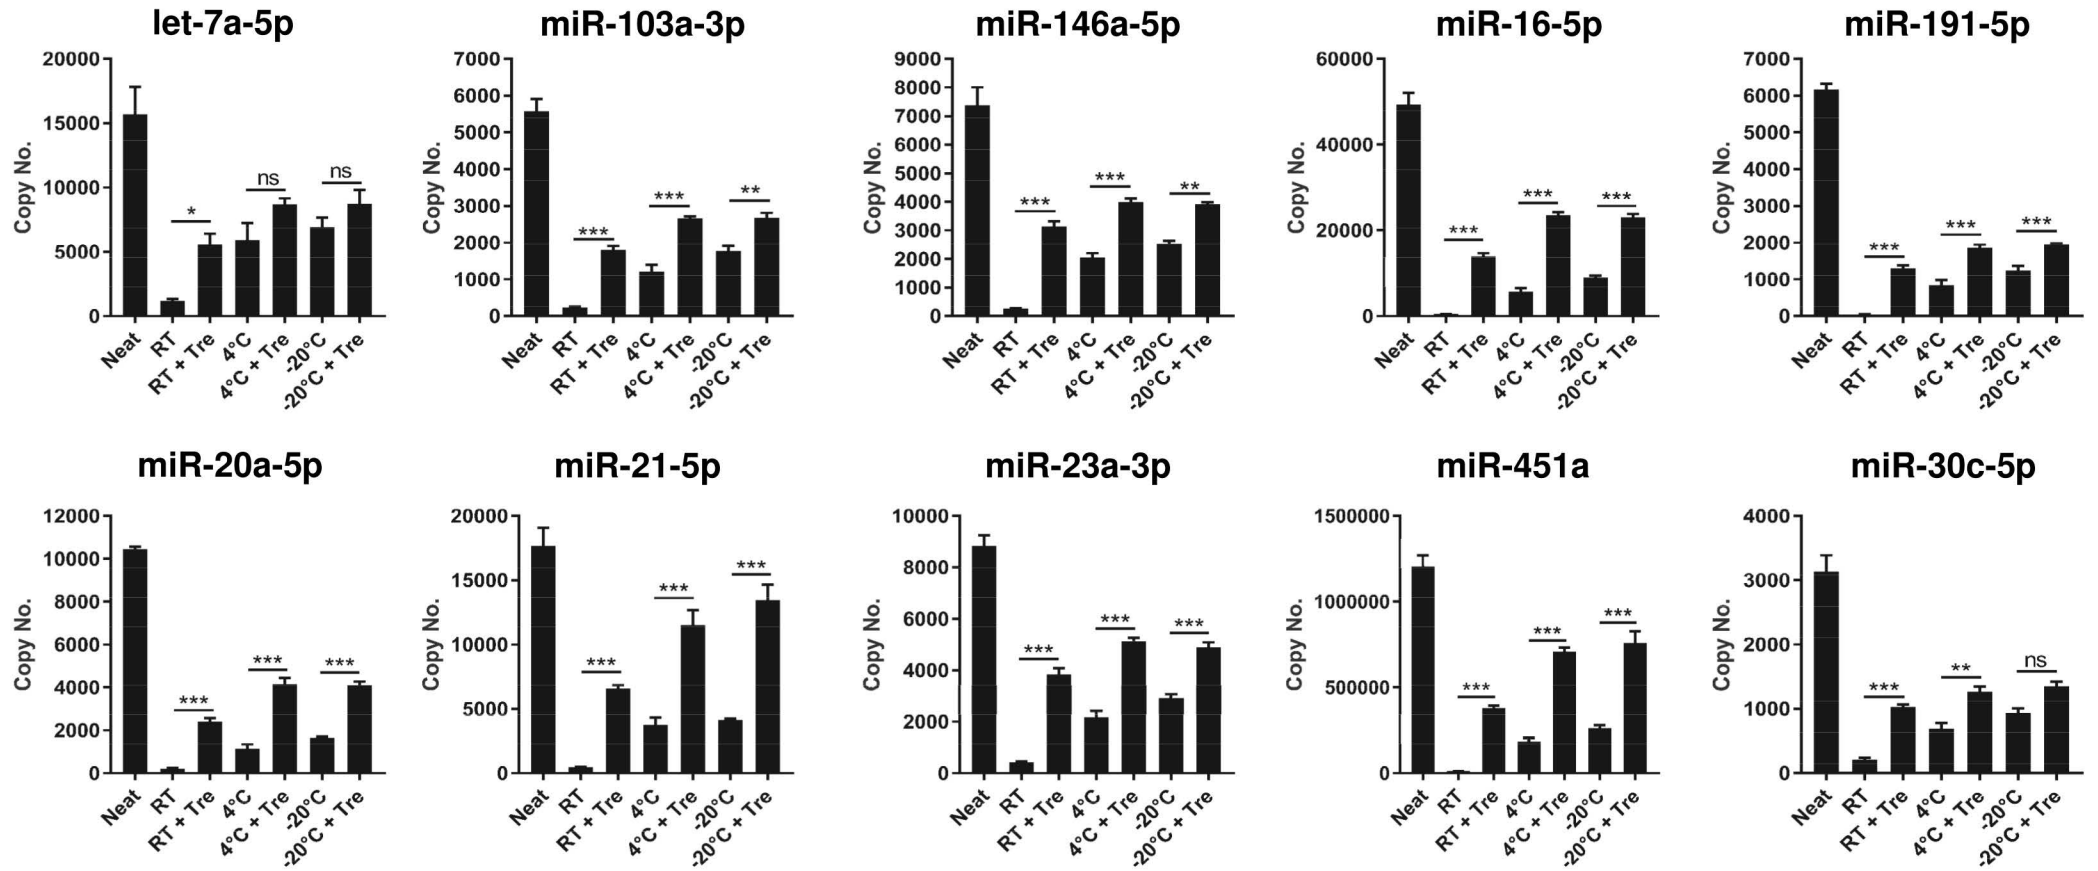

**B**

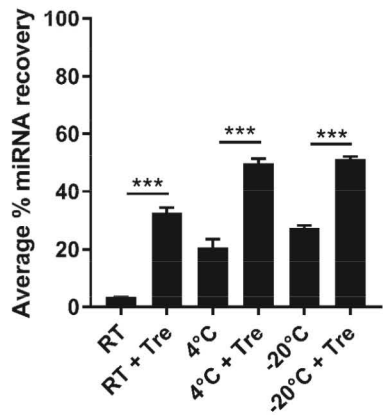



# Supplementary Figure 5

**A**

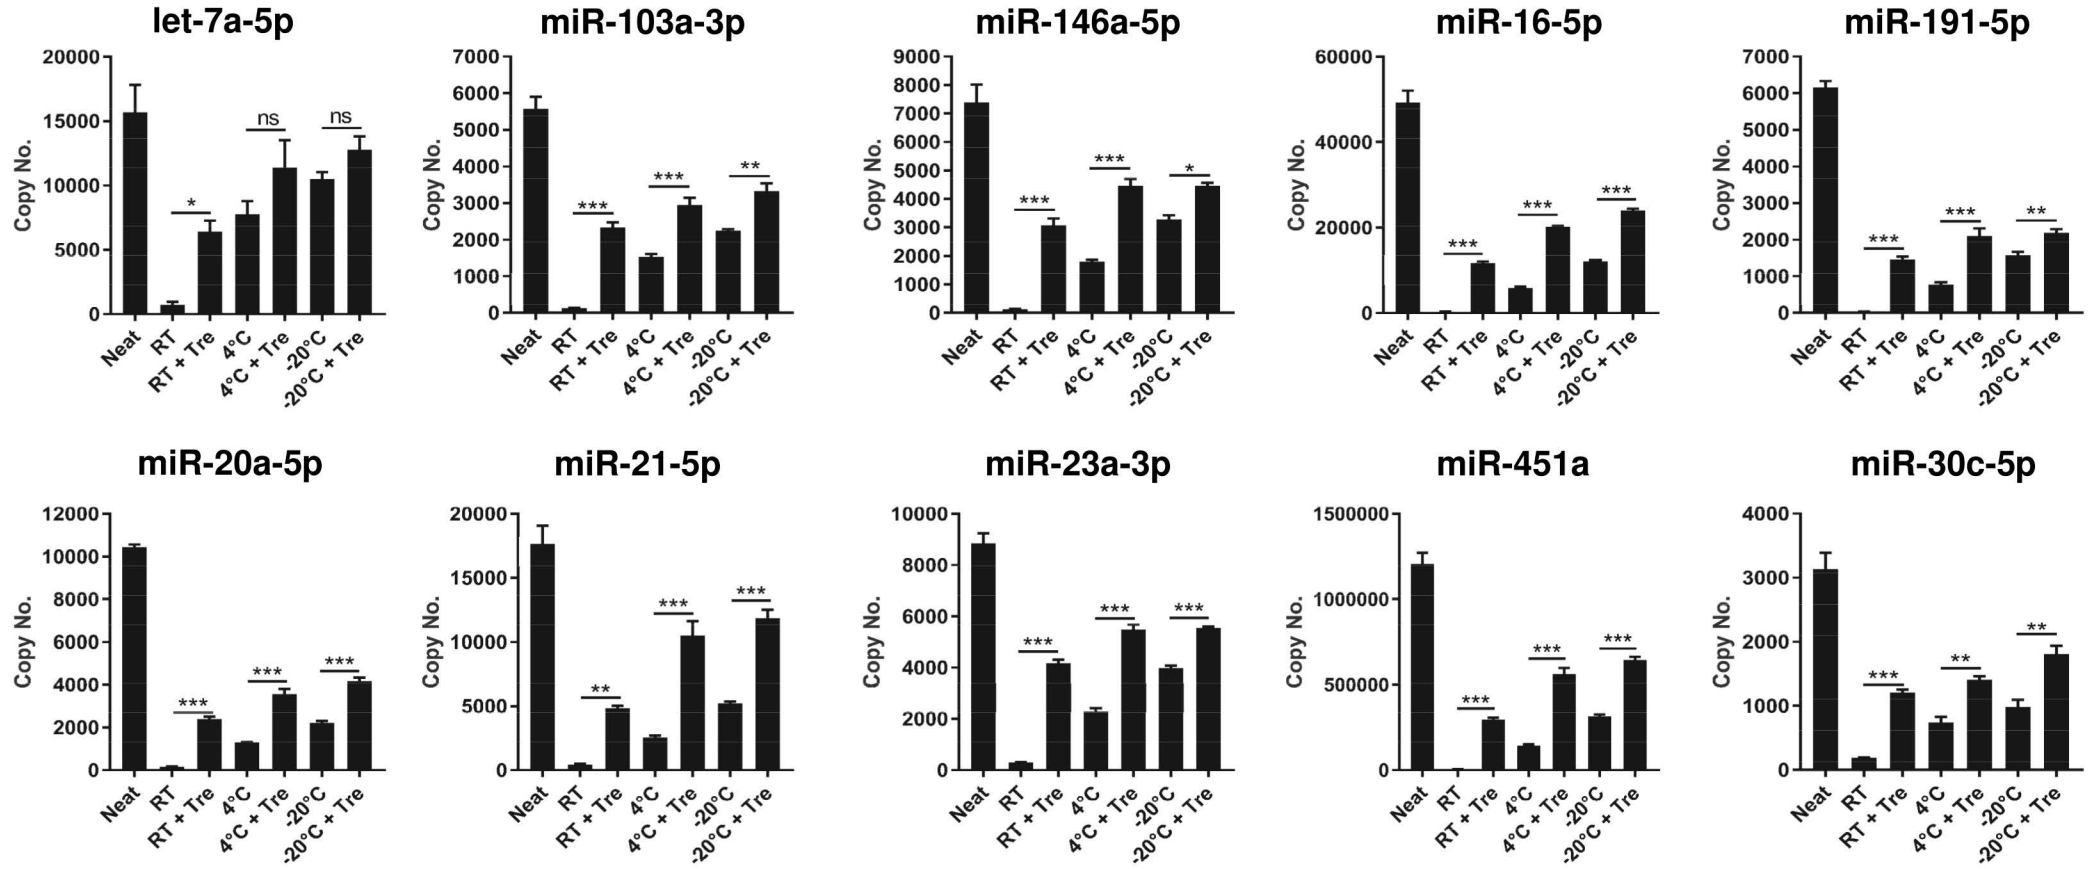

**B**

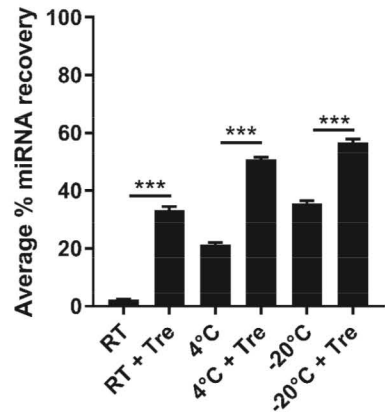

# Supplementary Figure 6

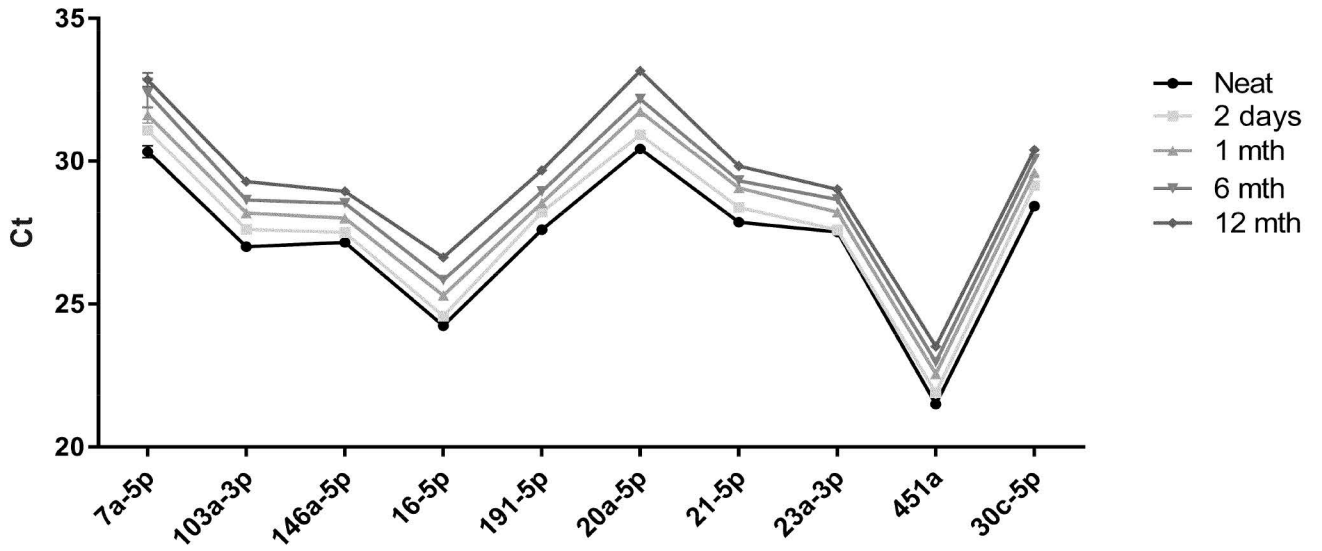

Supplement: 41598_2017_16960_MOESM1_ESM.pdf [file 41598_2017_16960_MOESM1_ESM.pdf]
